# Supplementary material for: Pharmacokinetics of DA-6886, A New 5-HT4 Receptor Agonist, in Rats
Source: MDPI journal article supplement (doi:10.3390/pharmaceutics14040702), 2022-03-25
Supplement: s1 [file s1]

# Supplementary Materials: Pharmacokinetics of DA-6886, A New 5-HT<sub>4</sub> Receptor Agonist, in Rats

Dae Young Lee and Hee Eun Kang

**Table S1.** Preparation of calibration standards for tissue homogenates.

**Table S1(a).** Grouping rat tissues based on blood perfusion, muscle mass and other properties.

| Group | Tissues                                           | Properties                                |
|-------|---------------------------------------------------|-------------------------------------------|
| 1     | Brain                                             | Contains a large amount of phospholipids. |
| 2     | Heart, lungs, liver, kidneys                      | High blood flow and red tissue.           |
| 3     | Stomach, small intestine, large intestine, muscle | Digestive system, lots of muscles.        |
| 4     | Fat                                               | Lots of fat.                              |

**Table S1(b).** Calibration standards for each group of tissues.

| Group | Tissue standards<br>(ng/g tissue)  |
|-------|------------------------------------|
| 1, 4  | 10, 30, 100, 300, 1000, 3000       |
| 2, 3  | 100, 300, 1000, 3000, 10000, 30000 |

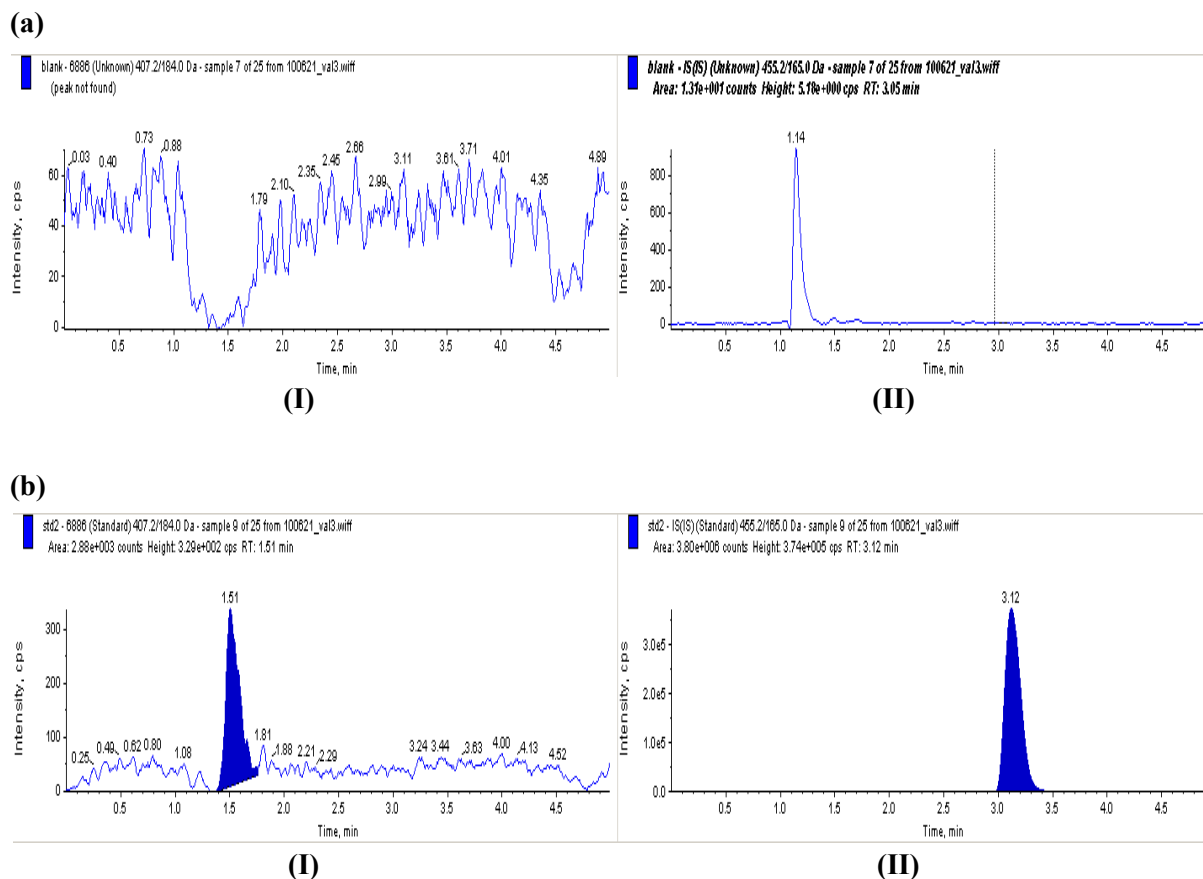

**Figure S1.** Representative MRM chromatograms of DA-6886 (I) and the IS verapamil (II) in rat plasma sample: (a) blank plasma; (b) blank plasma spiked with LLOQ level of DA-6886 (2 ng/mL) or mixed with the IS at working concentrations (50 ng/mL).

**Table S2.** Stability of DA-6886 in rat plasma at different storage conditions ( $n = 3$ ).

| Storage conditions                           | QC concentration (ng/mL) | Initially measured concentration (ng/mL) |        | Finally measured concentration (ng/mL) |        |                            |
|----------------------------------------------|--------------------------|------------------------------------------|--------|----------------------------------------|--------|----------------------------|
|                                              |                          | Mean $\pm$ S.D.                          | CV (%) | Mean $\pm$ S.D.                        | CV (%) | Relative Concentration (%) |
| Short term <sup>1</sup>                      | 6 (LQC)                  | 6.12 $\pm$ 0.400                         | 6.54   | 6.38 $\pm$ 0.403                       | 6.31   | 104                        |
|                                              | 1600 (HQC)               | 1563 $\pm$ 20.8                          | 1.33   | 1733 $\pm$ 40.4                        | 2.33   | 111                        |
| Post-preparative <sup>2</sup>                | 6 (LQC)                  | 6.12 $\pm$ 0.400                         | 6.54   | 6.05 $\pm$ 0.574                       | 9.48   | 99.0                       |
|                                              | 1600 (HQC)               | 1563 $\pm$ 20.8                          | 1.33   | 1523 $\pm$ 60.3                        | 3.96   | 97.4                       |
| Long term storage & Freeze-thaw <sup>3</sup> | 6 (LQC)                  | 6.12 $\pm$ 0.400                         | 6.54   | 5.97 $\pm$ 0.166                       | 2.78   | 97.5                       |
|                                              | 1600 (HQC)               | 1563 $\pm$ 20.8                          | 1.33   | 1767 $\pm$ 15.3                        | 0.865  | 113                        |

<sup>1</sup>Storage at room temperature for 4 h; <sup>2</sup>Storage of processed samples at 4°C for 24 h; <sup>3</sup>Storage at –20°C over 14 days and three cycles of –20°C to room temperature.
